# Supplementary material for: Rational element-doping of FeOOH-based electrocatalysts for efficient ammonia electrosynthesis
Source: Royal Society of Chemistry journal article supplement (doi:10.1039/d3ey00208j), 2023-11-01
Supplement: d3ey00208j1.pdf [file d3ey00208j1.pdf]

## Support Information

### **Rational Element-doping of FeOOH-based electrocatalysts for Efficient Ammonia Electrosynthesis**

Haifan Wang<sup>1,2,3</sup>, Menglei Yuan<sup>1,4\*</sup>, Jingxian Zhang<sup>1,2</sup>, Yiling Bai,<sup>5,6</sup> Ke Zhang<sup>7</sup>, Bin Li<sup>7\*</sup>, Guangjin Zhang<sup>1,2\*</sup>

<sup>1</sup> CAS Key Laboratory of Green Process and Engineering, Institute of Process Engineering, Chinese Academy of Sciences, Beijing 100190, China

<sup>2</sup> Center of Materials Science and Optoelectronics Engineering, University of Chinese Academy of Sciences, Beijing 100049, China

<sup>3</sup> School of Chemical Engineering, University of Chinese Academy of Sciences, Beijing 100049, China

<sup>4</sup> Northwestern Polytechnical University, Xian 710000, China

<sup>5</sup> CAS Key Laboratory of Carbon Materials, Institute of Coal Chemistry, Chinese Academy of Sciences, Taiyuan 030001, China

<sup>6</sup> SynCat@Beijing, Synfuels China Technology Co. Ltd, Beijing 101407, China

<sup>7</sup> Zhengzhou Tobacco Research Institute of CNTC, Zhengzhou 450001, China

E-mail addresses: lib@ztri.com.cn and zhanggj@ipe.ac.cn

## Characterization

X-ray diffraction (XRD, X'PERT PRO MPD diffractometer, Cu K $\alpha$  radiation,  $\lambda=0.15418$  nm, scanned range of 2 - 90 $^\circ$ ) was used to identify the crystal structure of all prepared catalysts. Scanning electron microscopy (SEM, JSM-7800F Prime) and transmission electron microscopy (TEM, JEM-2100F) were utilized to investigate the morphology of all samples. The Raman measurements were carried out on a Renishaw Raman Test system ( $\lambda = 532$  nm). Temperature programmed desorption (TPD) were recorded on the AutoChem II2920. X-ray photoelectron spectroscopy (XPS) data were collected by using Krato, AXIS-HS monochromatized Al K $\alpha$  cathode source of 75-150 W under ultrahigh vacuum. Fourier Transform Infrared Spectrometer (FTIR) and the spin state of the catalysts were tested on NICOLET Is 50 (Thermo) and MPMS-3 (Quantum Design), respectively. Moreover, the UV-visible adsorption spectra was recorded on a spectrophotometer (UV-2550).  $^1\text{H}$  NMR spectra was collected on a superconducting-magnet NMR spectrometer (Bruker AVANCE III HD 700 MHz).

## Electrochemical measurements

All electrochemical characterizations were performed using an electrochemical workstation CHI660E coupled with a three-electrode system in a H-type electrochemical reaction cell separated by Nafion 211 membrane. And the Nafion membrane was treated by boiling in ultrapure water for 1 h and heated in H $_2$ O $_2$  (5 %) aqueous solution at 80  $^\circ\text{C}$  for another 1 h. Carbon cloth utilized in this work was purchased from CeTech (W1S1009 type) and treated with the mixture of H $_2$ SO $_4$  and H $_2$ O $_2$  (1:3 vol.) for 12 h to remove surface impurities.

Potential without iR-compensated was converted to RHE scale via the following equation:  $E$  (vs. RHE) =  $E$  (vs. Ag/AgCl) + 0.0591  $\times$  pH + 0.197. All experiments were carried out at room temperature (25  $^\circ\text{C}$ ). To remove the impurities in the inlet gas, such as NO $_x$ , the pre-purification of high-purity N $_2$  (purity 99.999 %) and Ar (purity 99.999 %) by passing through two saturators filled with 0.05 M NaOH and 0.05 M H $_2$ SO $_4$  solution, respectively, to remove any possible contaminants. Then, the

electrolyte solution was purged with the purified raw gas (N<sub>2</sub>, Ar) for 30 minutes at a rate of 30 sccm in 0.1 M LiClO<sub>4</sub> + 20 % PEG.

Cyclic voltammetry (CV) test for activating the electrode was carried out at a scan rate of 50 mV s<sup>-1</sup> ranging from 0 to -1.0 V vs. RHE. Linear sweep voltammetry (LSV) was also conducted at a scan rate of 5 mV s<sup>-1</sup> ranging from 0 to -1.0V vs. RHE. Chronoamperometric tests were then conducted at different potentials (-0.4 - -0.8 V vs. RHE) and N<sub>2</sub> was continuously fed into the cathodic cell during the experiments. The recycle test was to perform five consecutive cycles of chronoamperometric tests without changing the electrolyte at -0.6 V vs. RHE. Electrochemical impedance spectroscopy (EIS) was conducted at a frequency range from 100 kHz to 1 Hz with a 10 mV AC signal amplitude.

#### **Determination of NH<sub>3</sub> concentration by indophenol blue method<sup>1</sup>**

When tested in 0.1 M LiClO<sub>4</sub> and 0.1 M LiClO<sub>4</sub> + 20 % PEG, the produced NH<sub>3</sub> was spectrophotometrically determined by the indophenol blue method. Typically, 2 mL of the sample solution was removed from the cathodic chamber. Afterward, 2 mL of 1.0 M NaOH solution containing 5 wt% salicylic acid and 5 wt% sodium citrate was added, followed by 1 mL NaClO solution (0.05 M) and 0.2 mL of an aqueous solution of sodium nitroferricyanide (1 wt%) were added. After standing at room temperature for 2 h, the UV-Vis absorption spectrum was collected at a wavelength of 655 nm. The concentration-absorbance curve was calibrated using standard NH<sub>4</sub>Cl solution for a series of concentrations.

The fitting curve shows good linear relation of absorbance value with NH<sub>4</sub>Cl concentration by three times independent calibration tests.

#### **Determination of hydrazine concentration using the Watt and Chrisp method<sup>2</sup>**

The production of N<sub>2</sub>H<sub>4</sub> in the electrolyte was estimated by the Watt and Chrisp method. The mixture of p-dimethylaminobenzaldehyde (5.99 g), concentrated HCl (30 mL) and ethanol (300 mL) was used as a color reagent. Then 2 mL above prepared reagent was mixed with 2mL of sample solution, and stirred 15 min at room

temperature. Absorbance of the resulting solution was measured at 470 nm. The concentration-absorbance curve was calibrated using standard N<sub>2</sub>H<sub>4</sub> solution for a series of concentrations.

The fitting curve shows good linear relation of absorbance value with N<sub>2</sub>H<sub>4</sub> concentration by three times independent calibration tests.

### **Calculation of Faradaic efficiency (FE) and NH<sub>3</sub> formation rate**

The FE for NRR was defined as the amount of electric charge used for producing NH<sub>3</sub> divided by the total charge passing through the electrodes during the electrolysis. Assuming three electrons were needed to produce one NH<sub>3</sub> molecule, the FE was calculated according to the following equation:

$$FE = 3 \times F \times C_{\text{NH}_4\text{Cl}} \times V / (53.5 \times Q)$$

The yield rate of NH<sub>3</sub> was calculated using the following equation:

$$\text{NH}_3 \text{ yield rate} = 0.318 \times C_{\text{NH}_4\text{Cl}} \times V / (m_{\text{cat}} \times t)$$

Where **F** is Faraday constant (96485 C mol<sup>-1</sup>), **C<sub>NH4Cl</sub>** is the measured mass concentration of NH<sub>4</sub>Cl; **V** is the volume of the cathodic reaction electrolyte; **Q** is the quantity of applied charge/electricity; **t** is the time for which the potential was applied; **m<sub>cat</sub>** is the mass of catalyst loaded at the carbon cloth.

### **DFT calculations**

Spin-polarized density functional theory (DFT) calculations were conducted using the Vienna Ab initio Simulation Package (VASP)<sup>3,4</sup>. The projector augmented wave (PAW) method was used to describe electron-ion interactions. A generalized gradient approximation (GGA) used the exchange-correlational function of Perdew–Burke–Ernzerhof (PBE) with DFT+U correction (U = 5.3). The DFT-D3 empirical correction method was employed to describe van der Waals interactions<sup>5</sup>. Herein, the (400) plane of FeOOH was chosen as the computational model (mp-1237867, Materials Project). According to the results of EDS and ICP measurement, reasonable amounts of Mo and S atoms selectively replace the original Fe sites and hydroxyl groups in FeOOH cell. The cutoff energy for the plane-wave basis was set as 400 eV,

and the total energy convergence was set to be lower than  $1 \times 10^{-5}$  eV, with the force convergence set at 0.05 eV/Å for geometric optimizations. A Monkhorst-Pack k-points setting of  $2 \times 3 \times 1$  and  $3 \times 4 \times 1$  were used to sample the Brillouin zone for geometry optimizations and electronic structure computations, respectively. The adsorption energy ( $E_{\text{ads}}$ ) of adsorbate was defined as  $E_{\text{ads}} = E - E_{\text{slab}} - E^*$ , where  $E$ ,  $E_{\text{slab}}$ , and  $E^*$  are total energies of catalyst with adsorbates, the isolate catalyst, and the corresponding adsorbates, respectively<sup>6</sup>. In addition, the free energy of the electrochemical steps of the reaction was calculated based on the computational hydrogen electrode (CHE) model. The free energies of species were calculated as  $G = E_{\text{DFT}} + E_{\text{ZPE}} - T\Delta S$ , where  $E_{\text{DFT}}$  was obtained from DFT energy,  $E_{\text{ZPE}}$ , and  $T\Delta S$  of adsorbed species were calculated by vibration analysis, whereas the thermodynamic corrections for gas molecules were from the standard database.

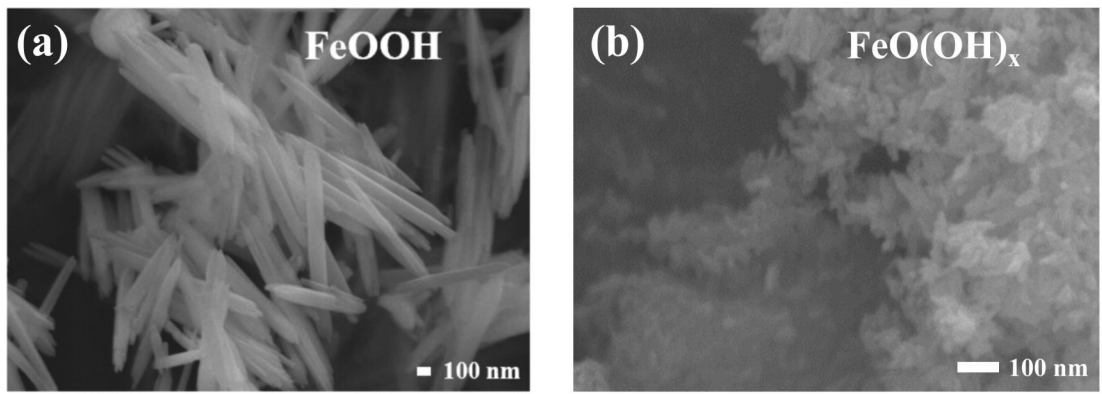

**Figure S1.** SEM images of pristine FeOOH (a) and FeO(OH)<sub>x</sub> (b) samples.

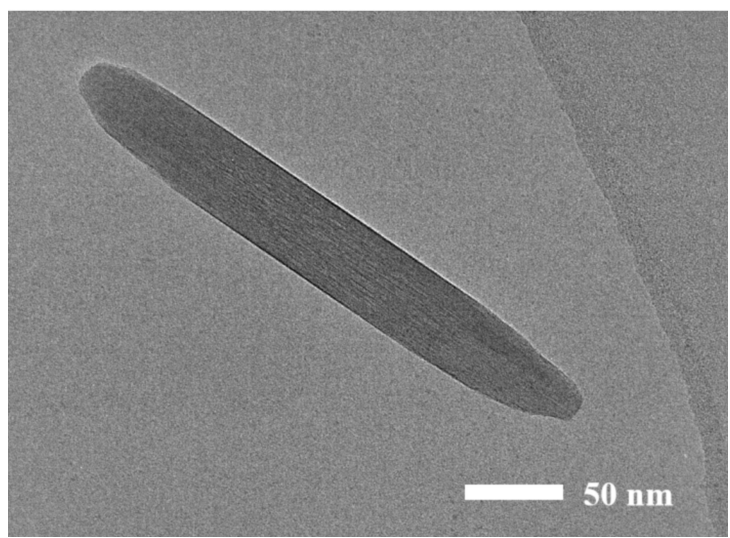

**Figure S2.** TEM image of FeO(OH, S) sample.

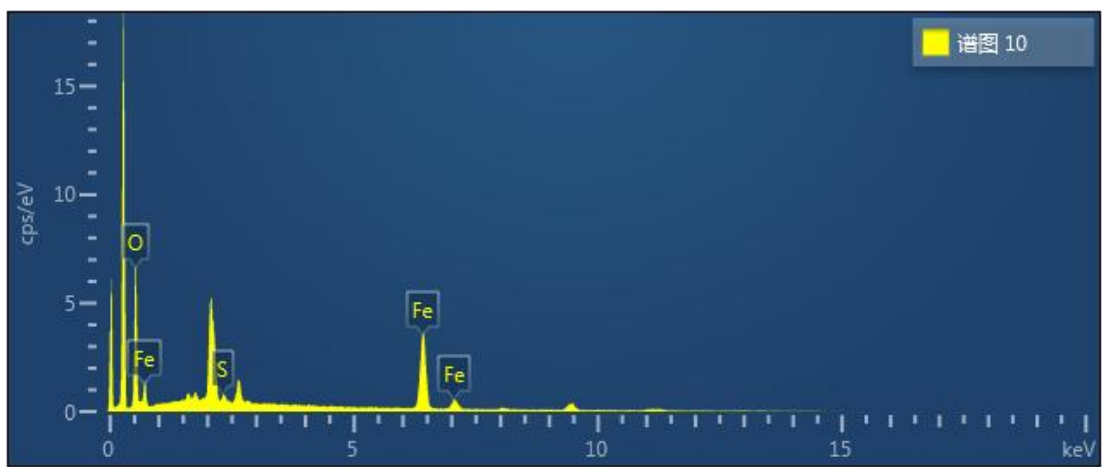

**Figure S3.** Elemental characteristic peaks of FeO(OH, S) sample by EDS analysis.

**Table S1.** The content of element in FeO(OH, S) by EDS analysis.

| <b>Elements</b> | <b>Mass fraction (wt%)</b> |
|-----------------|----------------------------|
| Fe              | 76.42 %                    |
| O               | 21.99 %                    |
| S               | 1.60 %                     |

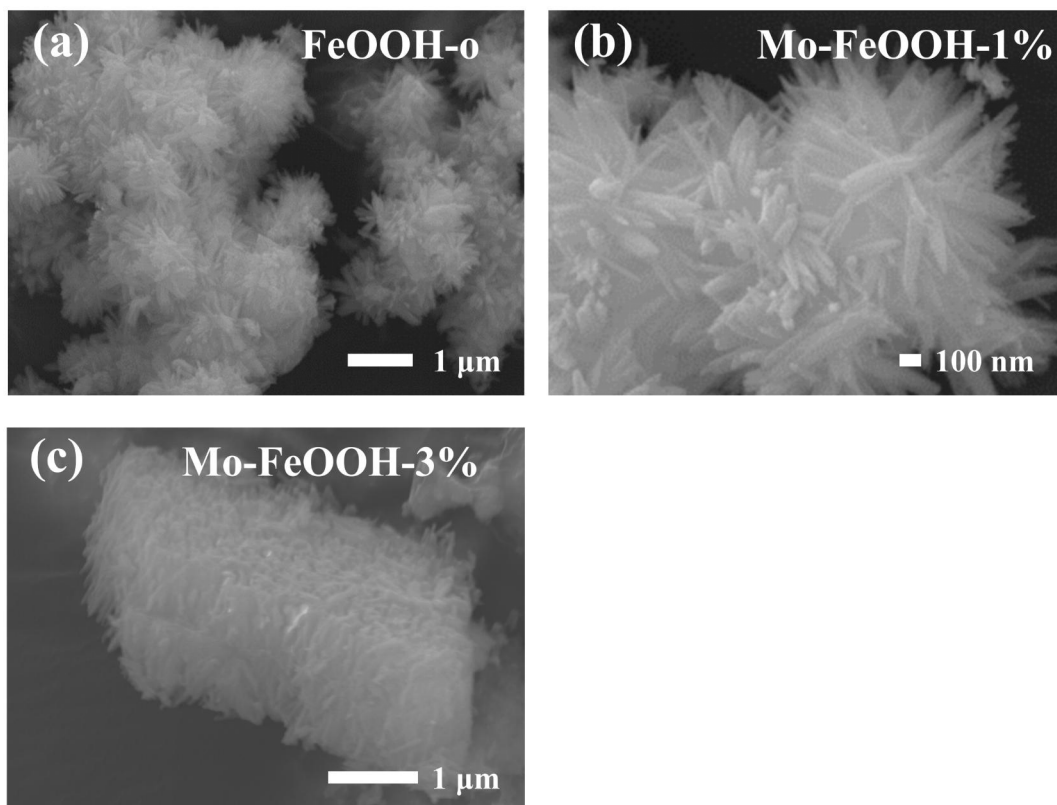

**Figure S4.** SEM images of FeOOH-o (a) , Mo-FeOOH (1 %) (b) and Mo-FeOOH (3 %) (c) samples.

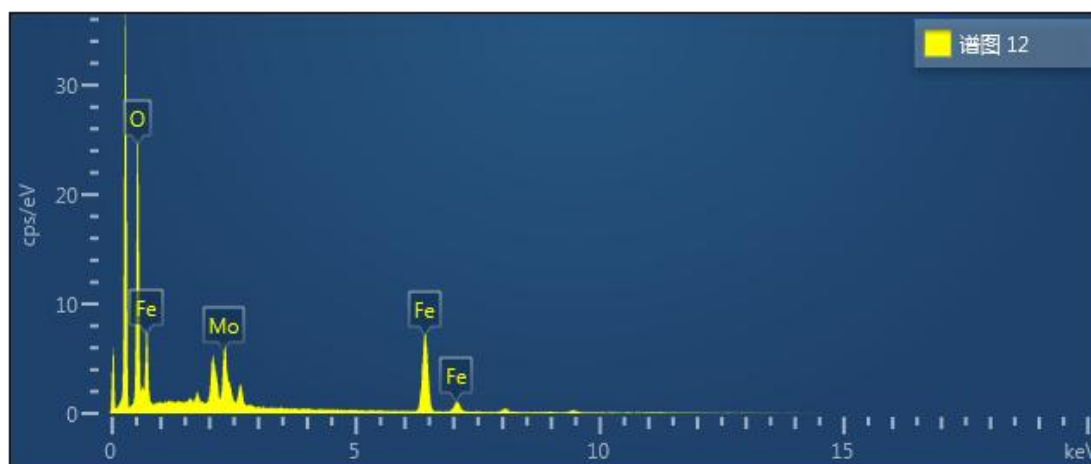

**Figure S5.** Elemental characteristic peaks of Mo-FeOOH sample by EDS analysis.



**Table S2.** The content of element in Mo-FeOOH by EDS analysis.

| <b>Elements</b> | <b>Mass fraction (wt%)</b> |
|-----------------|----------------------------|
| Fe              | 47.08 %                    |
| O               | 36.32 %                    |
| Mo              | 16.60 %                    |

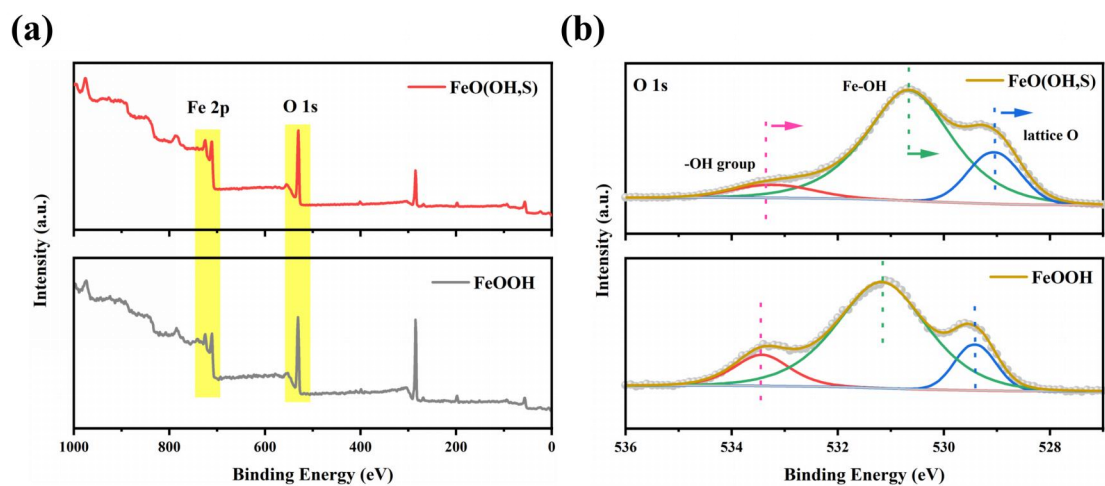

**Figure S6.** (a) XPS survey spectra of pristine FeOOH and FeO(OH, S) catalysts; (b) High-resolution O 1s spectra of pristine FeOOH and FeO(OH, S) catalysts.

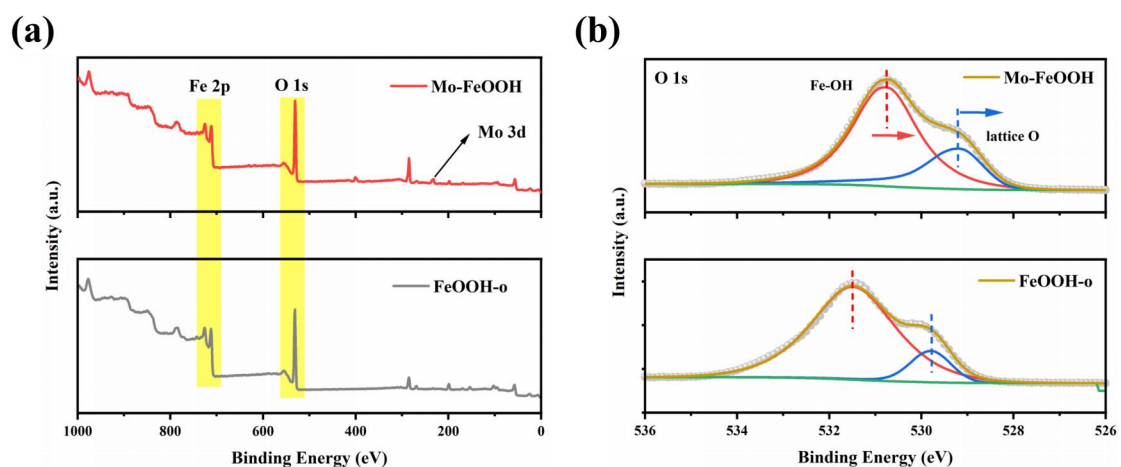

**Figure S7.** (a) XPS survey spectra of FeOOH-o and Mo-FeOOH catalysts; (b) High-resolution O 1s spectra of FeOOH-o and Mo-FeOOH catalysts.

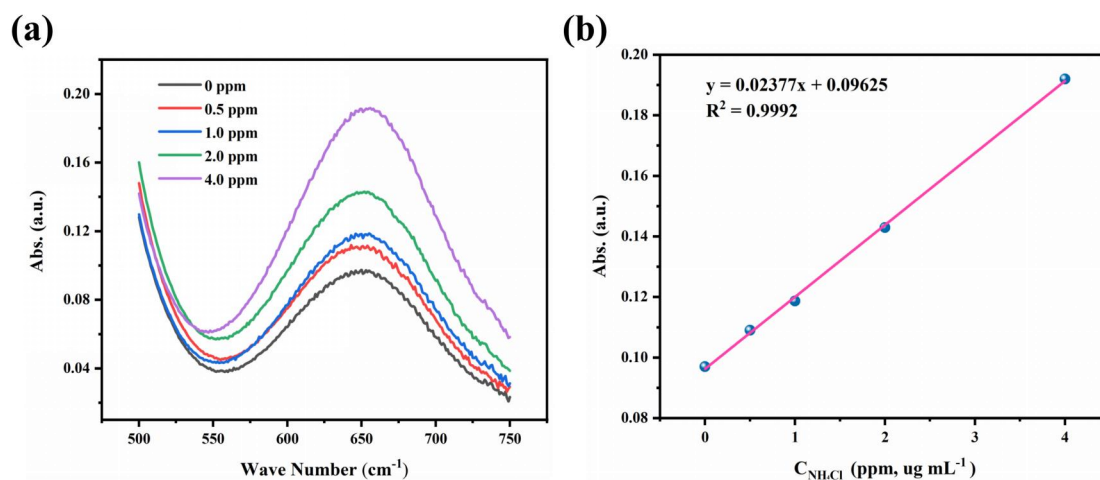

**Figure S8.** UV-vis curves (a) and concentration-absorbance curve (b) of  $\text{NH}_4\text{Cl}$  solution with a series of standard concentration (0 - 4  $\mu\text{g mL}^{-1}$ ) in 0.1 M  $\text{LiClO}_4$  + 20 % PEG. The standard curve shown good linear relation of absorbance with  $\text{NH}_4\text{Cl}$  concentration ( $y = 0.02377x + 0.09625$ ,  $R^2 = 0.9992$ ). The absorbance at 655 nm was measured by UV-vis spectrophotometer.

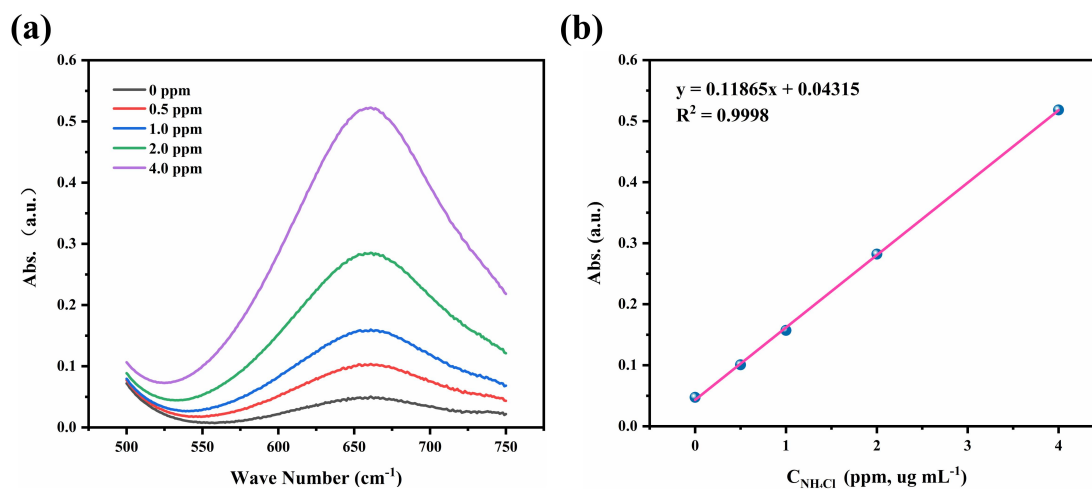

**Figure S9.** UV-vis curves(a) and concentration-absorbance(b) of  $\text{NH}_4\text{Cl}$  solution with a series of standard concentration (0-4  $\mu\text{g mL}^{-1}$ ) in 0.1 M  $\text{LiClO}_4$ . The standard curve shown good linear relation of absorbance with  $\text{NH}_4\text{Cl}$  concentration ( $y=0.11865x+0.04315$ ,  $R^2=0.9998$ ). The absorbance at 655 nm was measured by UV-vis spectrophotometer.

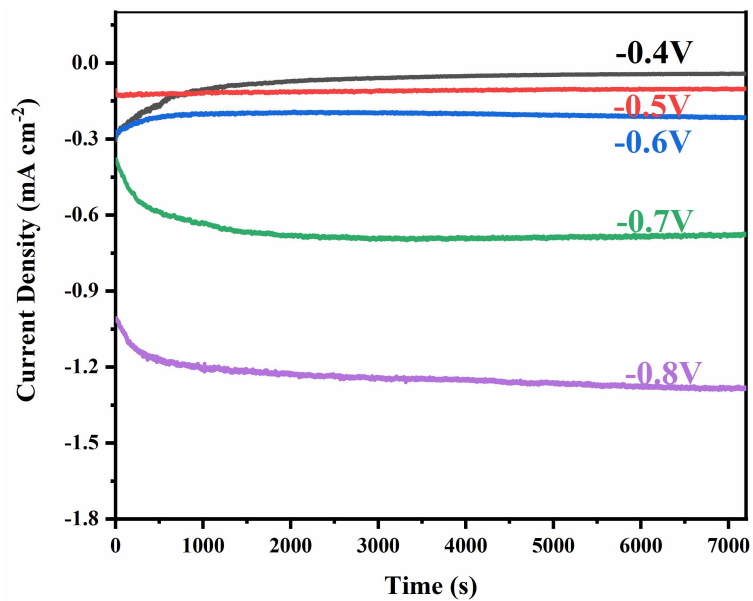

**Figure S10.** The chronoamperometric curves of FeO(OH, S) catalyst at various potentials for 2 h.

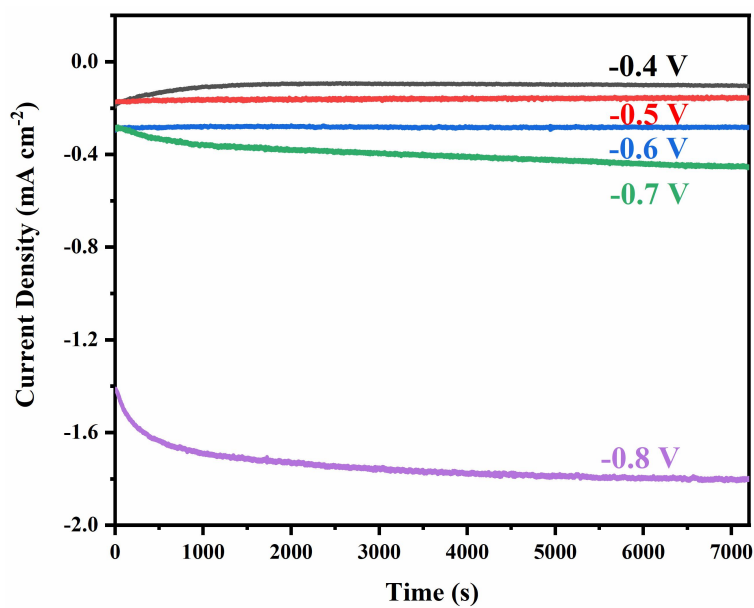

**Figure S11.** The chronoamperometric curves of Mo-FeOOH catalyst at various potentials for 2 h.

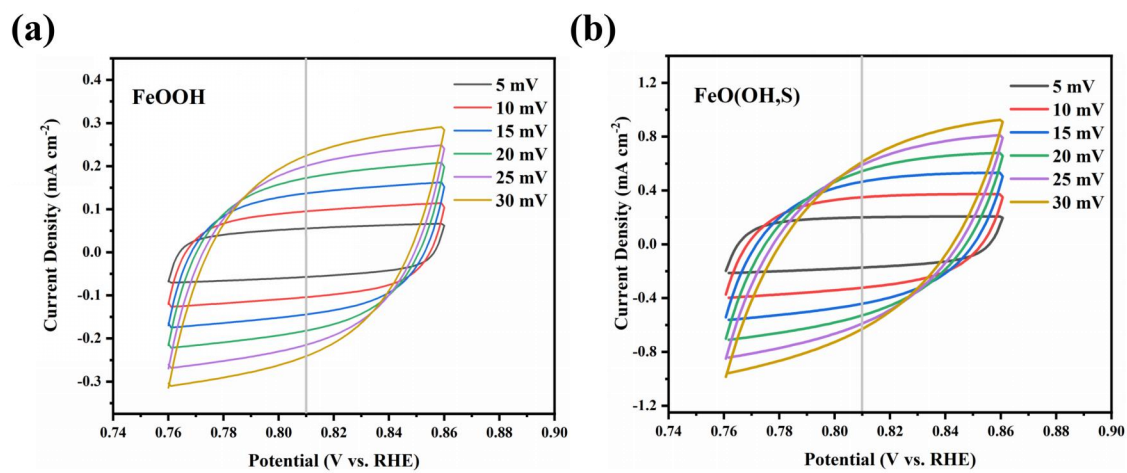

**Figure S12.** CV curves of (a) pristine FeOOH; (b) FeO(OH, S) catalysts with different scan rates.

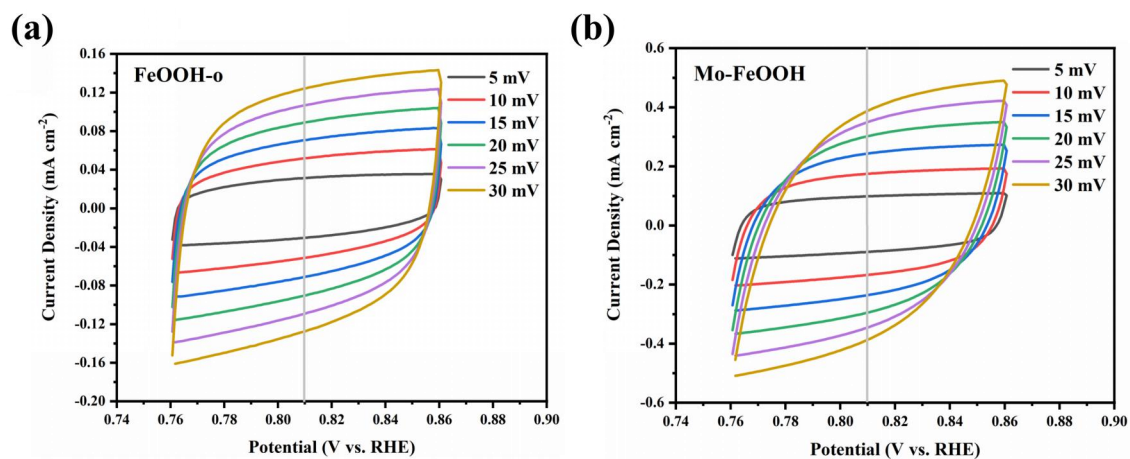

**Figure S13.** CV curves of (a) FeOOH-o; (b) Mo-FeOOH catalysts with different scan rates.

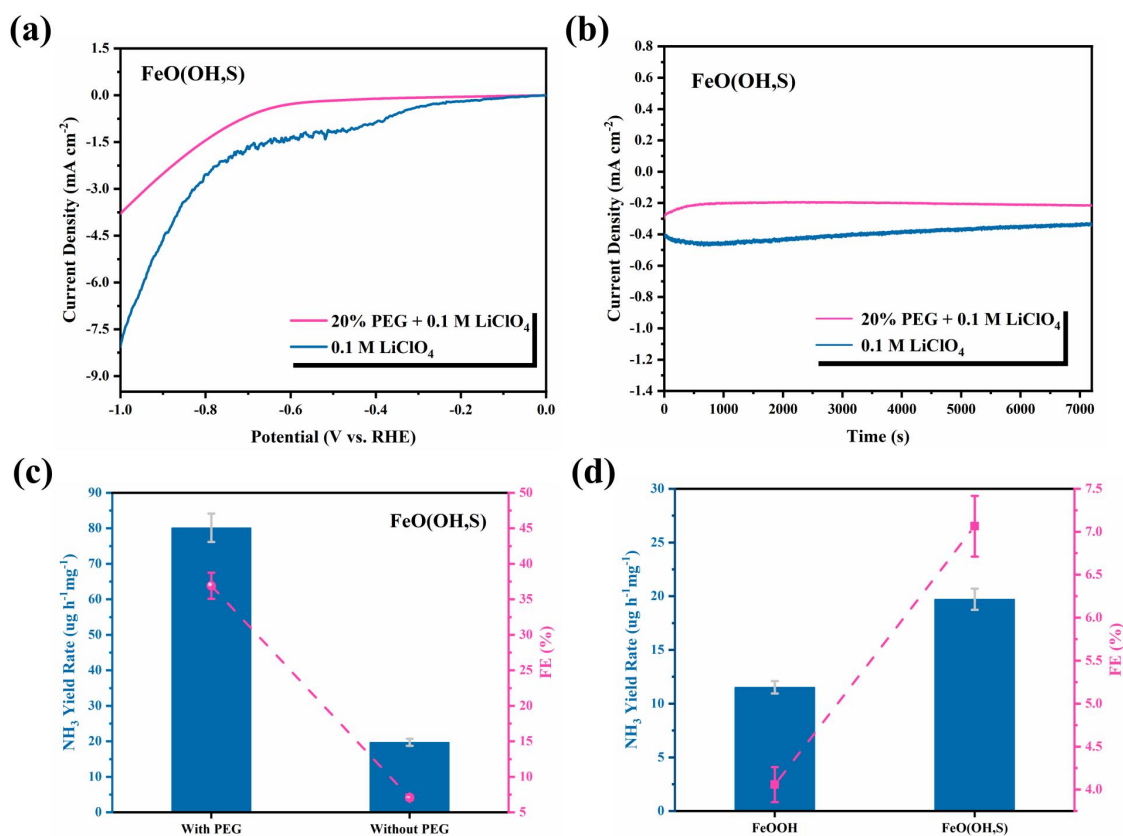

**Figure S14.** (a) The LSV of FeO(OH, S) catalyst in  $N_2$  saturated electrolyte with different content of PEG; (b) The chronoamperometric curves of FeO(OH, S) catalyst at -0.6 V vs. RHE for 2 h with different content of PEG; (c) The ammonia yield rate and Faradic efficiencies of FeO(OH, S) catalyst at -0.6 V vs. RHE in  $N_2$  saturated electrolyte with different content of PEG; (d) The ammonia yield rate of pristine FeOOH and FeO(OH, S) catalysts.

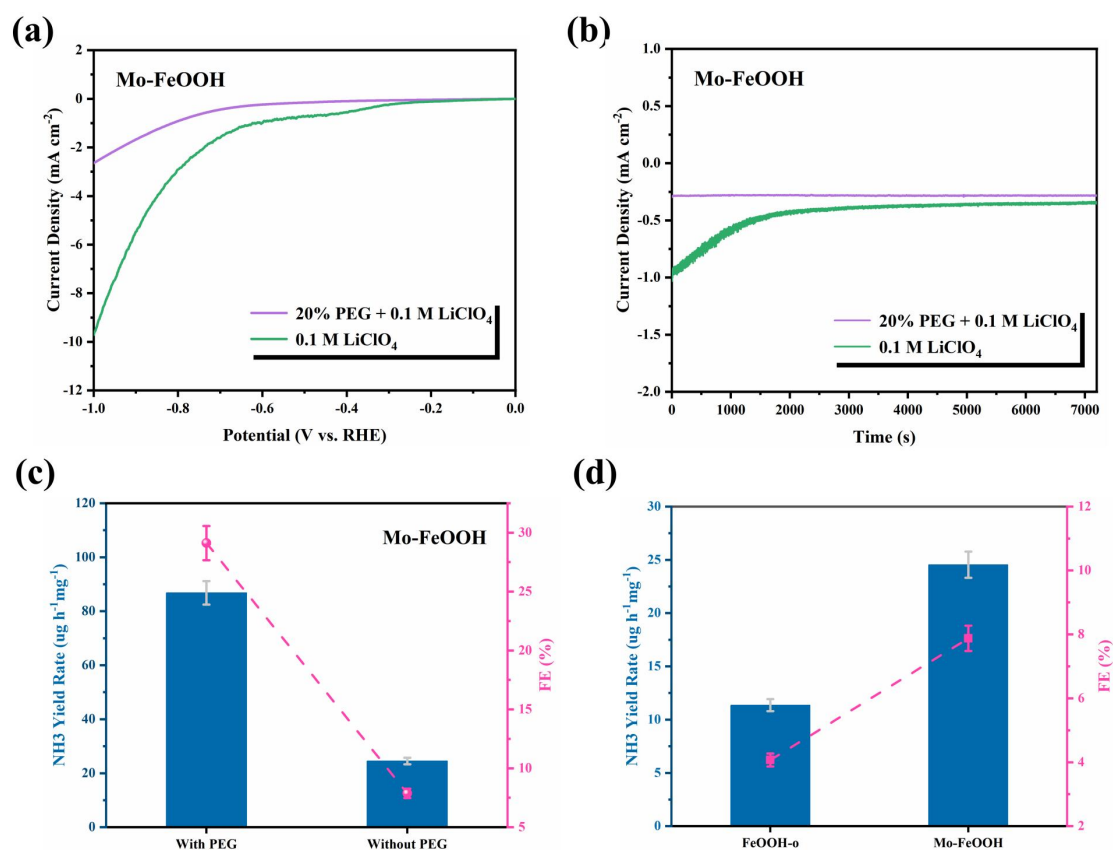

**Figure S15.** (a) The LSV of Mo-FeOOH catalyst in  $N_2$  saturated electrolyte with different content of PEG; (b) The chronoamperometric curves of Mo-FeOOH catalyst at -0.6 V vs. RHE for 2 h with different content of PEG; (c) The ammonia yield rate and Faradic efficiencies of Mo-FeOOH catalyst at -0.6 V vs. RHE in  $N_2$  saturated electrolyte with different content of PEG; (d) The ammonia yield rate of FeOOH-o and Mo-FeOOH catalysts.

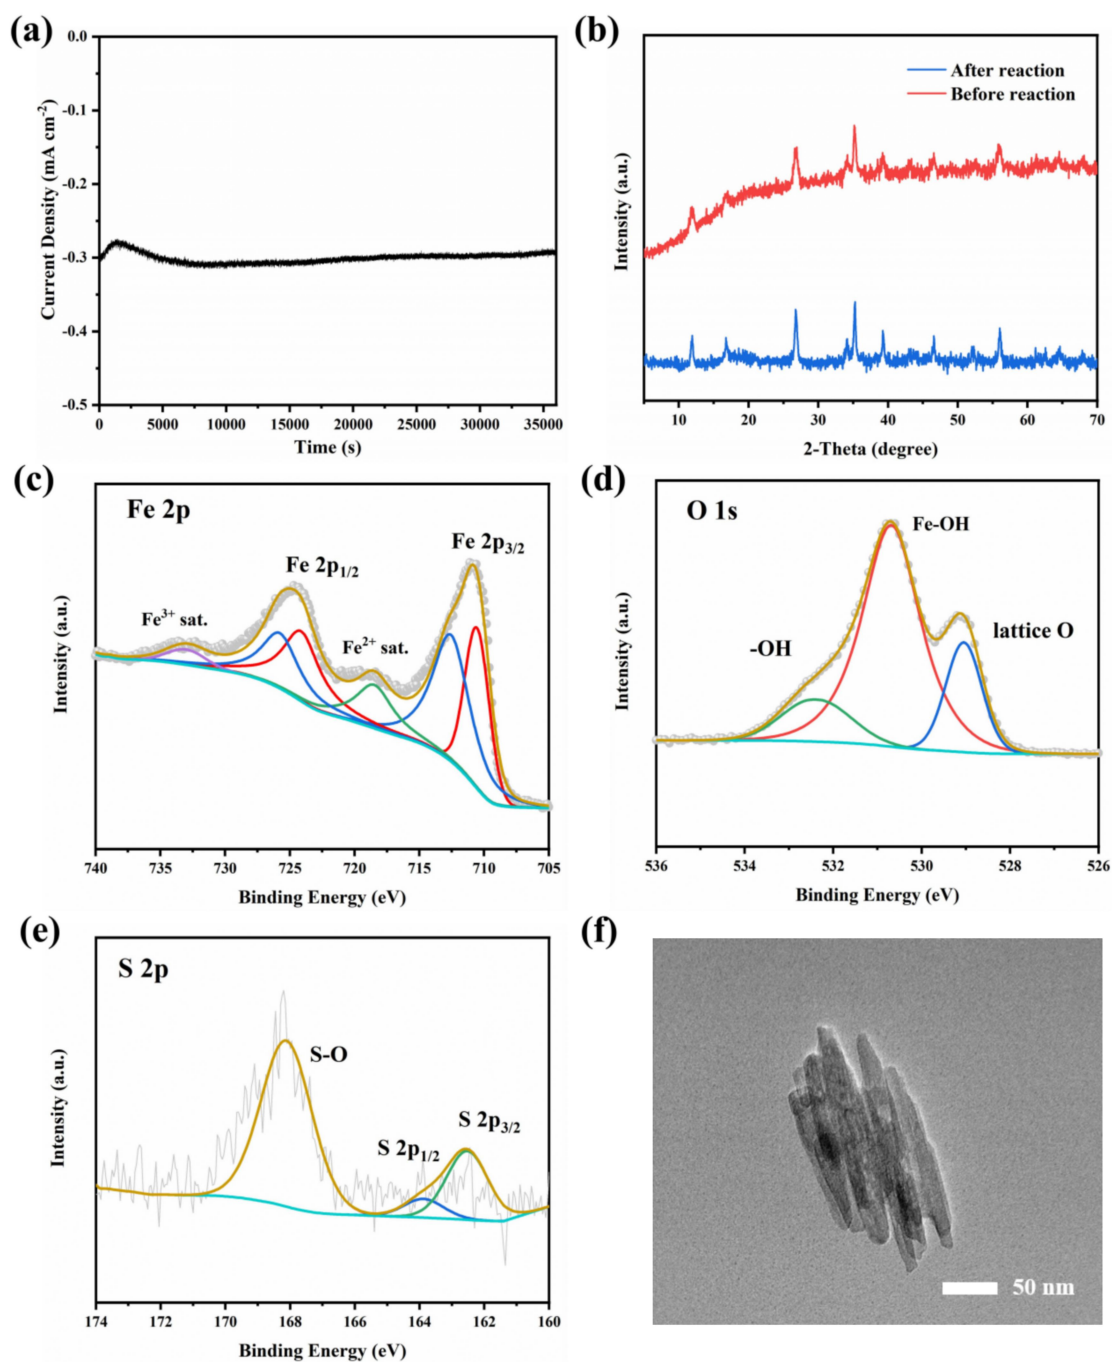

**Figure S16.** (a) The chronoamperometric curves of FeO(OH, S) catalyst at -0.6 V vs. RHE for 10 h in N<sub>2</sub> saturated 0.1 M LiClO<sub>4</sub> + 20 % PEG solution; (b) XRD patterns; (c) High-resolution Fe 2p spectrum; (d) High-resolution O 1s spectrum; (e) High-resolution S 2p spectrum; (e) TEM pattern of FeO(OH, S) catalyst after 10 h electrolysis.



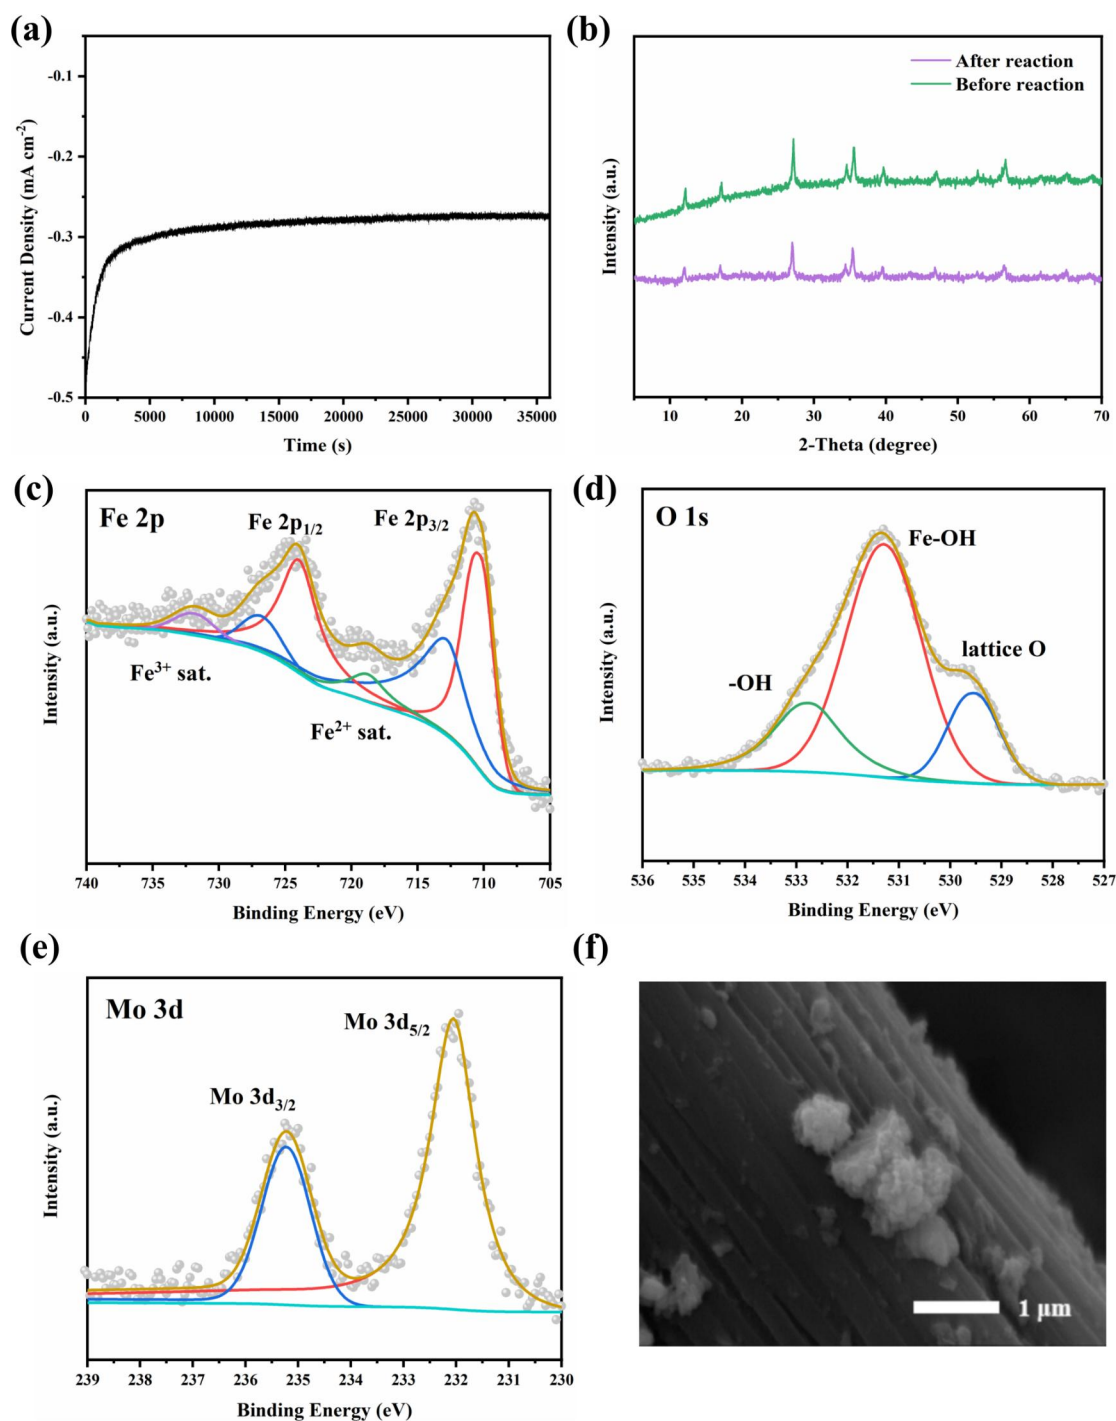

**Figure S17.** (a) The chronoamperometric curves of Mo-FeOOH catalyst at -0.6 V vs. RHE for 10 h in  $N_2$  saturated 0.1 M  $LiClO_4$  + 20 % PEG solution; (b) XRD patterns; (c) High-resolution Fe 2p spectrum; (d) High-resolution O 1s spectrum; (e) High-resolution Mo 3d spectrum; (f) SEM pattern of Mo-FeOOH catalyst after 10 h electrolysis.

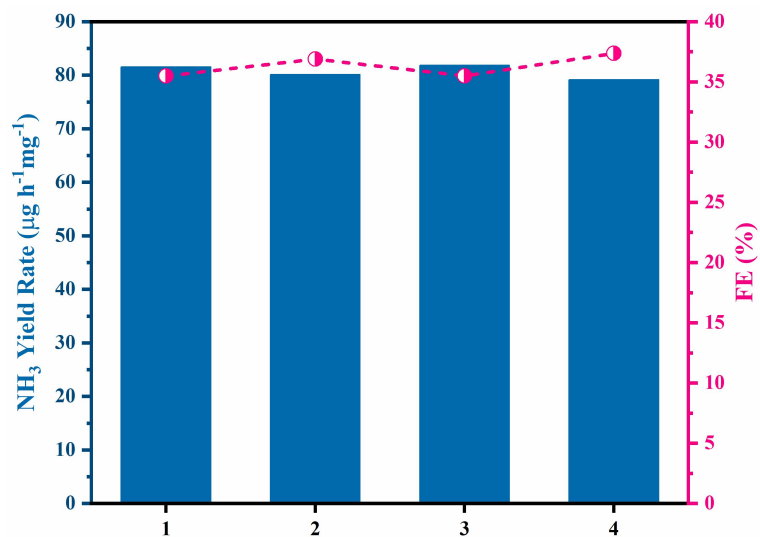

**Figure S18.** The Faradaic efficiency and ammonia production rate of FeO(OH, S) catalyst at -0.6 V vs. RHE during recycling tests for four times.

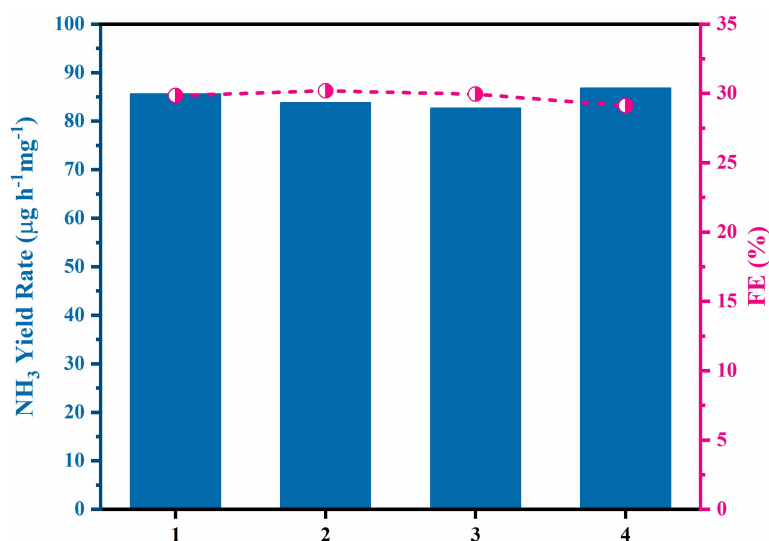

**Figure S19.** The Faradaic efficiency and ammonia production rate of Mo-FeOOH catalyst at -0.6 V vs. RHE during recycling tests for four times.

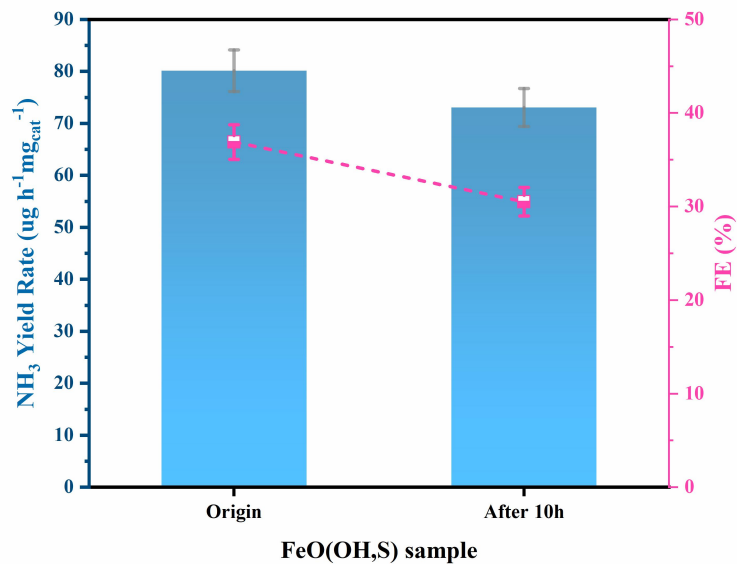

**Figure S20.**  $\text{NH}_3$  production rates and FEs after long-term electrocatalytic test of 10 h for FeO(OH, S).

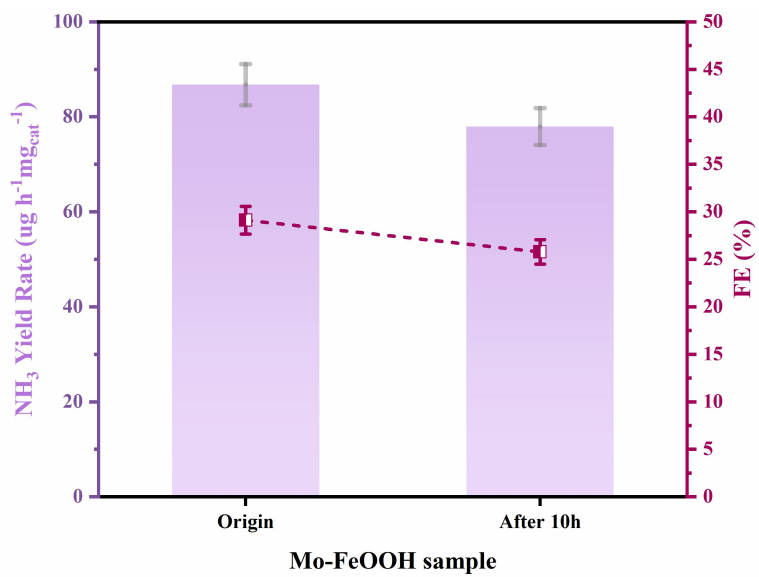

**Figure S21.**  $\text{NH}_3$  production rates and FEs after long-term electrocatalytic test of 10 h for Mo-FeOOH.

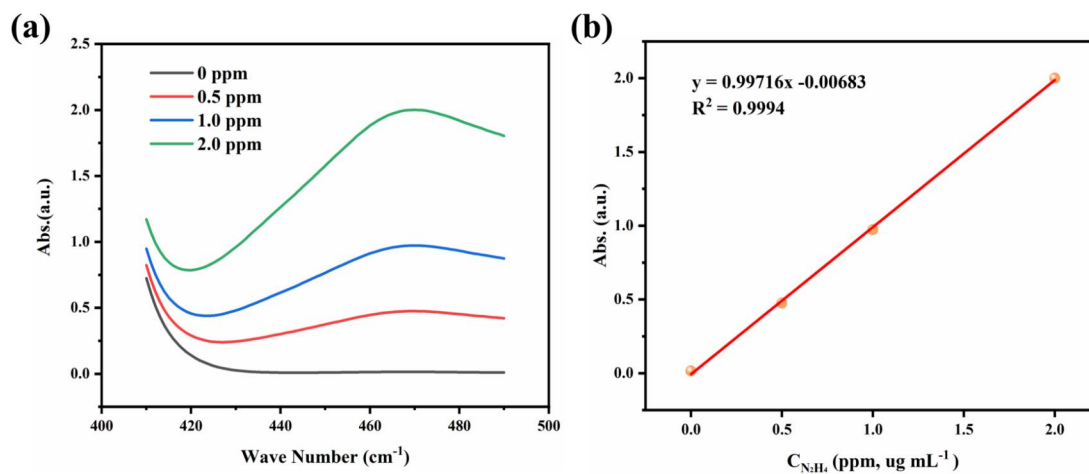

**Figure S22.** UV-vis curves (a) and concentration-absorbance curve (b) of  $N_2H_4$  solution with a series of standard concentration (0 - 2  $\mu g mL^{-1}$ ) in 0.1 M  $LiClO_4$  + 20 % PEG; The absorbance at 470 nm was measured by UV-vis spectrophotometer; The standard curve shown good linear relation of absorbance with  $N_2H_4$  concentration ( $y = 0.99716x - 0.00683, R^2 = 0.9994$ ).

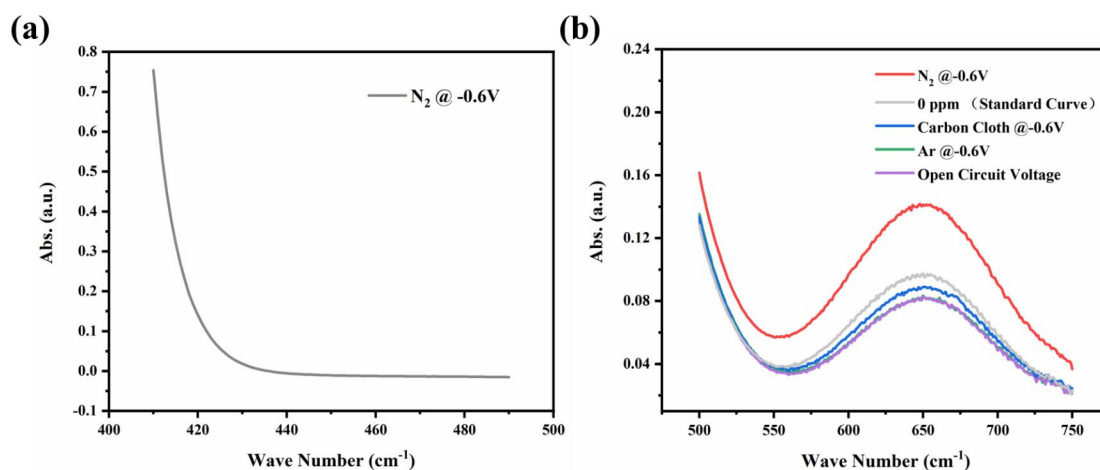

**Figure S23.** (a) UV-vis spectra of the electrolyte stained with  $\text{N}_2\text{H}_4$  indicator after electrolysis 2 h in  $\text{N}_2$ -saturated solution at the potential of -0.6 V vs. RHE for  $\text{FeO}(\text{OH}, \text{S})$  catalyst; (b) UV-vis spectra of the electrolyte stained with  $\text{NH}_4^+$  indicator under bare carbon cloth, prepared catalyst, open circle voltage after electrolysis 2 h in  $\text{N}_2$ -saturated solution and under prepared catalyst after electrolysis 2 h in Ar-saturated solution at the potential of -0.6 V vs. RHE for  $\text{FeO}(\text{OH}, \text{S})$  catalyst.

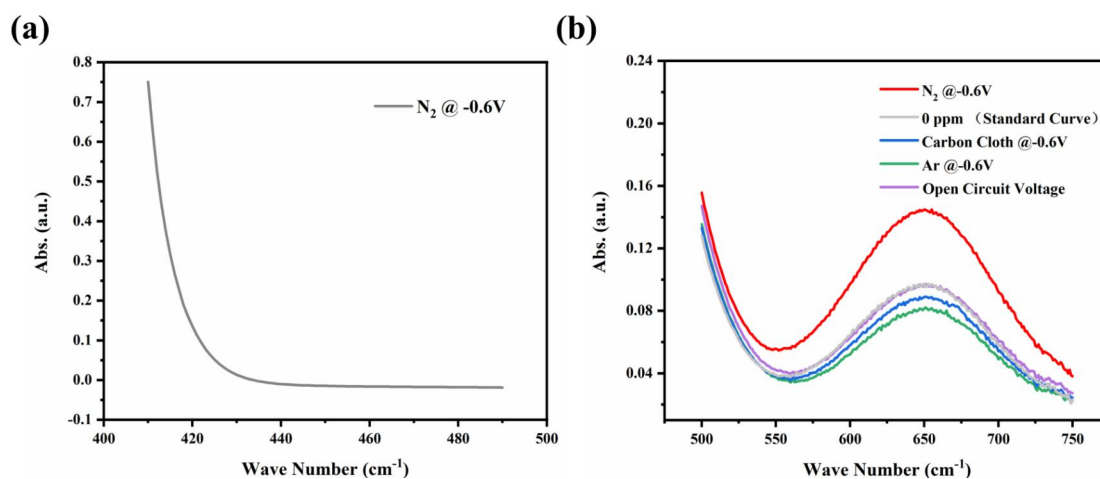

**Figure S24.** (a) UV-vis spectra of the electrolyte stained with  $\text{N}_2\text{H}_4$  indicator after electrolysis 2 h in  $\text{N}_2$ -saturated solution at the potential of -0.6 V vs. RHE for  $\text{Mo-FeOOH}$  catalyst; (b) UV-vis spectra of the electrolyte stained with  $\text{NH}_4^+$  indicator under bare carbon cloth, prepared catalyst, open circle voltage after electrolysis 2 h in  $\text{N}_2$ -saturated solution and under prepared catalyst after electrolysis 2 h in Ar-saturated solution at the potential of -0.6 V vs. RHE for  $\text{Mo-FeOOH}$  catalyst.

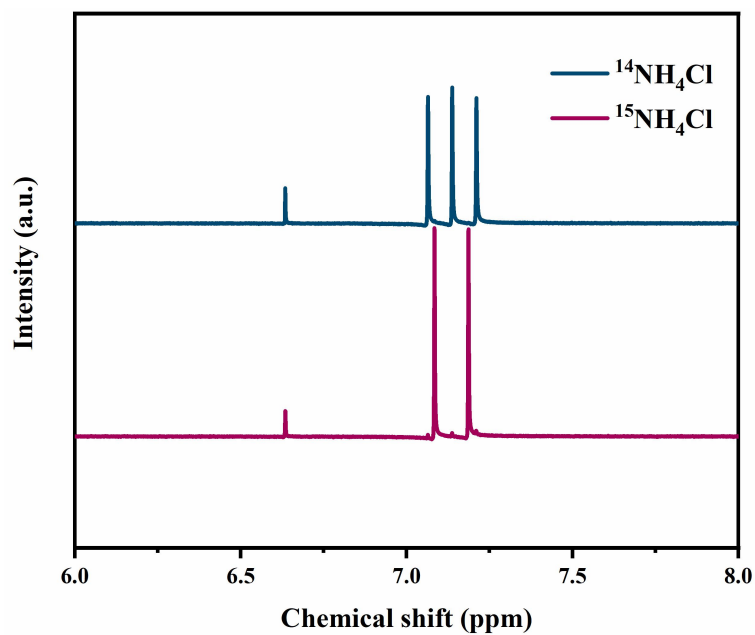

**Figure S25.**  $^1\text{H}$  NMR spectra of standard  $^{15}\text{NH}_4\text{Cl}/^{14}\text{NH}_4\text{Cl}$  solution.

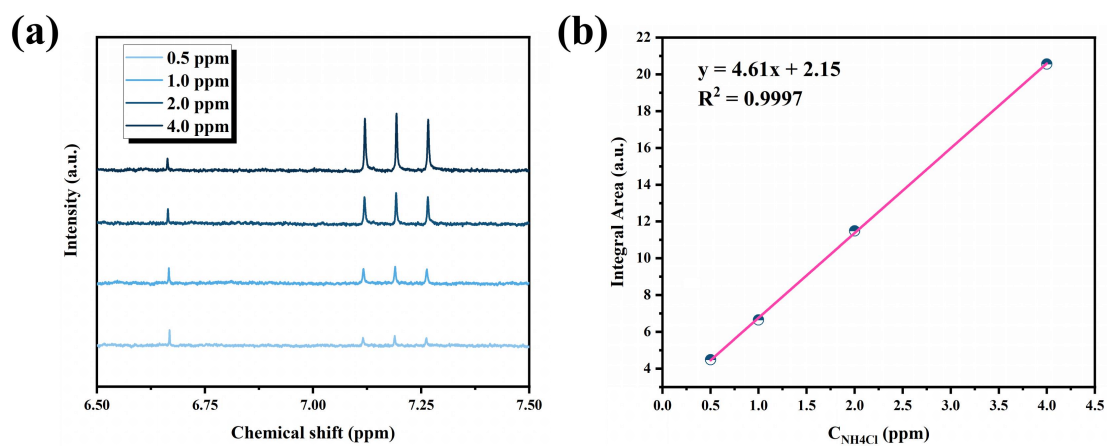

**Figure S26.** (a)  $^{14}\text{NH}_4\text{Cl}$  solution with a series of standard concentration (0.5 - 4  $\mu\text{g mL}^{-1}$ ) in 0.1 M  $\text{LiClO}_4$  + 20 % PEG; (b) the standard curve shown good linear relation of integral area with  $^{14}\text{NH}_4\text{Cl}$  concentration ( $y = 4.61x + 2.15$ ,  $R^2 = 0.9997$ ).

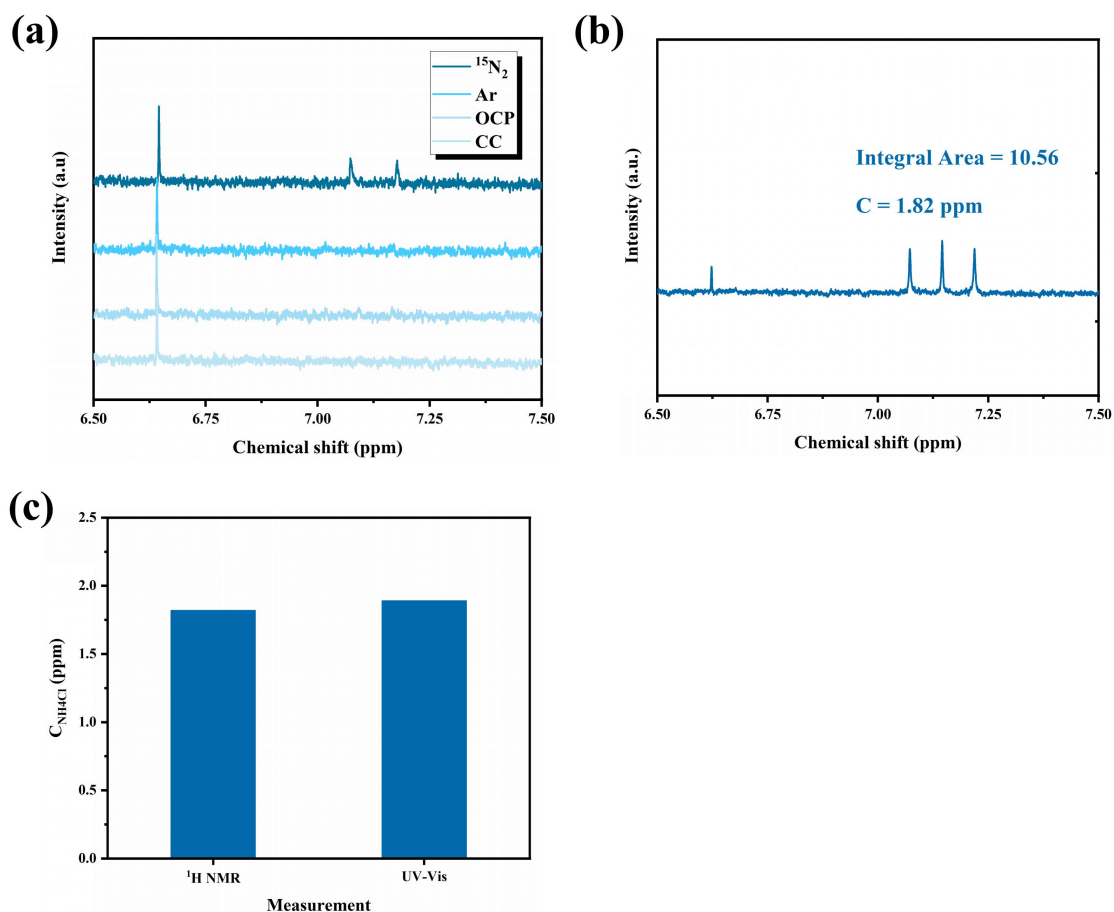

**Figure S27.** (a)  $^{15}\text{N}_2$  and blank experiments in 0.1 M  $\text{LiClO}_4$  + 20 % PEG under different situations; (b) electrolyte saturated with  $^{14}\text{N}_2$  after 2 h of electrolysis; (c) the ammonia yield of  $\text{FeO}(\text{OH}, \text{S})$  catalyst after 2 h of electrolysis determined using the UV-Vis spectrum and  $^1\text{H}$  NMR spectra.

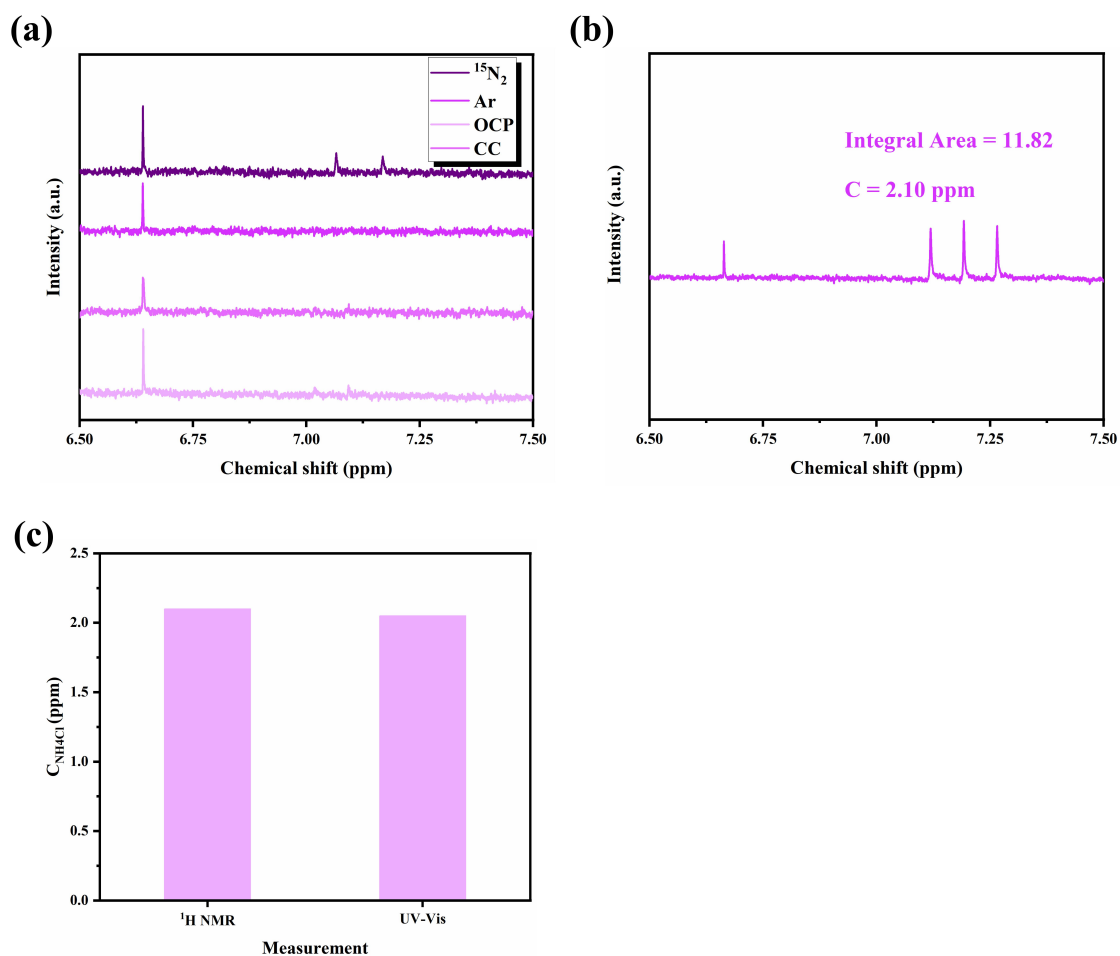

**Figure S28.** (a)  $^{15}\text{N}_2$  and blank experiments in 0.1 M  $\text{LiClO}_4$  + 20 % PEG under different situations; (b) electrolyte saturated with  $^{14}\text{N}_2$  after 2 h of electrolysis; (c) the ammonia yield of Mo-FeOOH catalyst after 2 h of electrolysis determined using the UV-Vis spectrum and  $^1\text{H}$  NMR spectra.



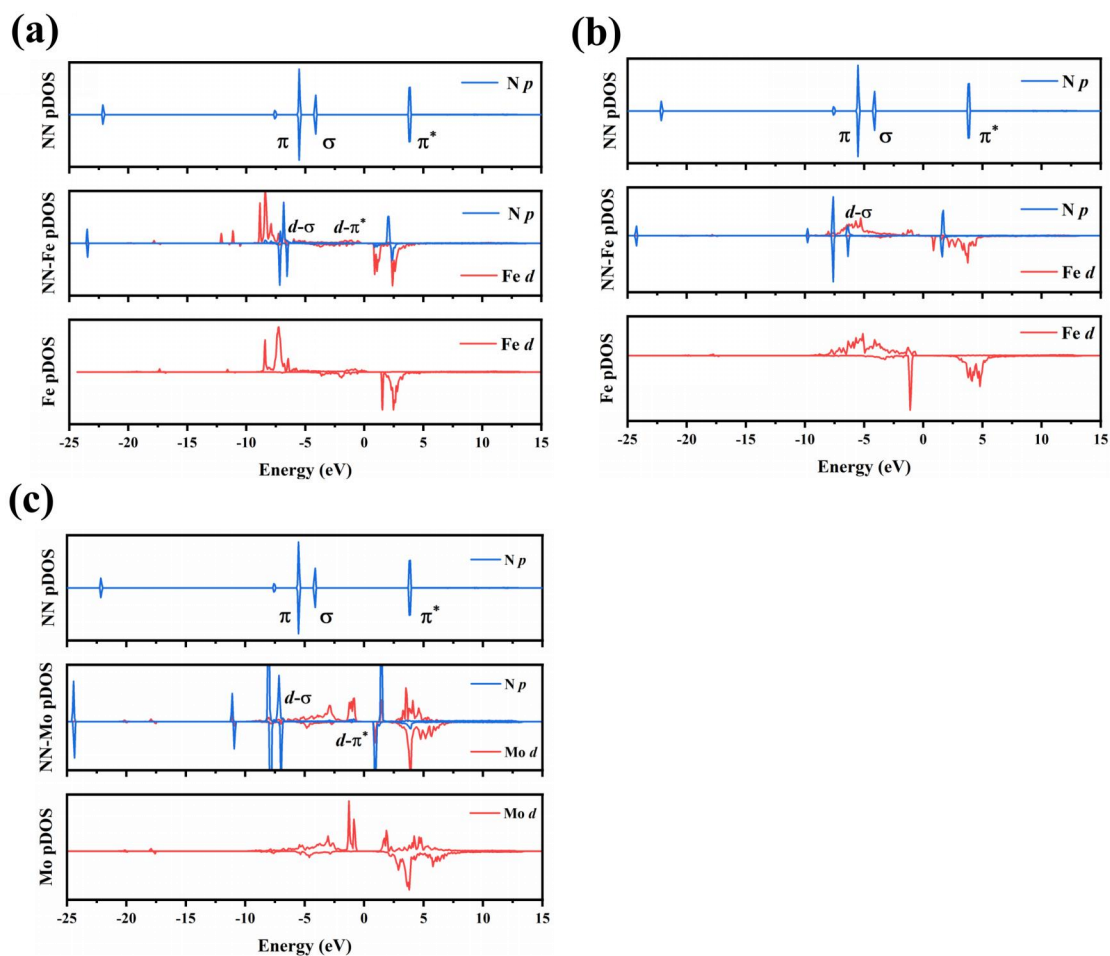

**Figure S29.** (a) The pDOS of N<sub>2</sub> adsorbed at Fe sites from FeO(OH, S); (b) The pDOS of N<sub>2</sub> adsorbed at Fe sites from Mo-FeOOH catalyst; (c) The pDOS of N<sub>2</sub> adsorbed at Mo sites from Mo-FeOOH catalyst.

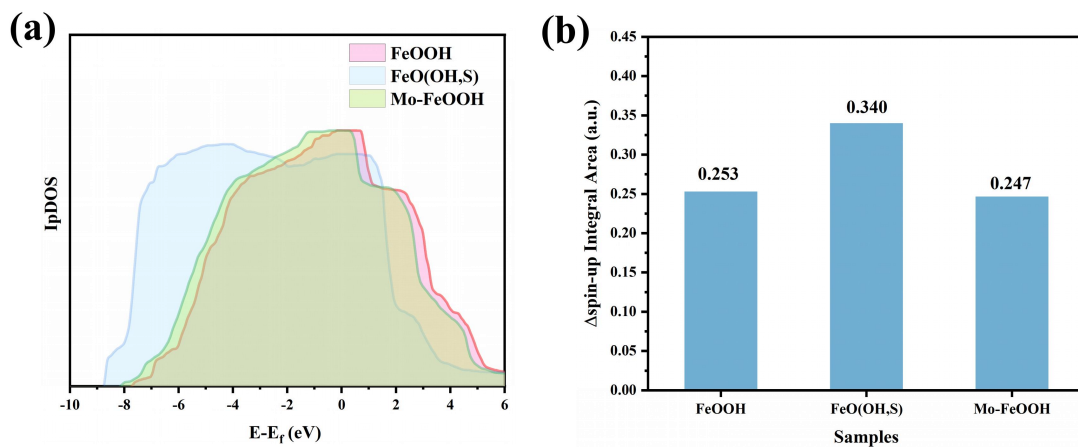

**Figure S30.** The net spin up ( $\Delta$ spin-up) of Fe sites in pristine FeOOH, FeO(OH, S) and Mo-FeOOH species (a) and corresponding integral area (b).

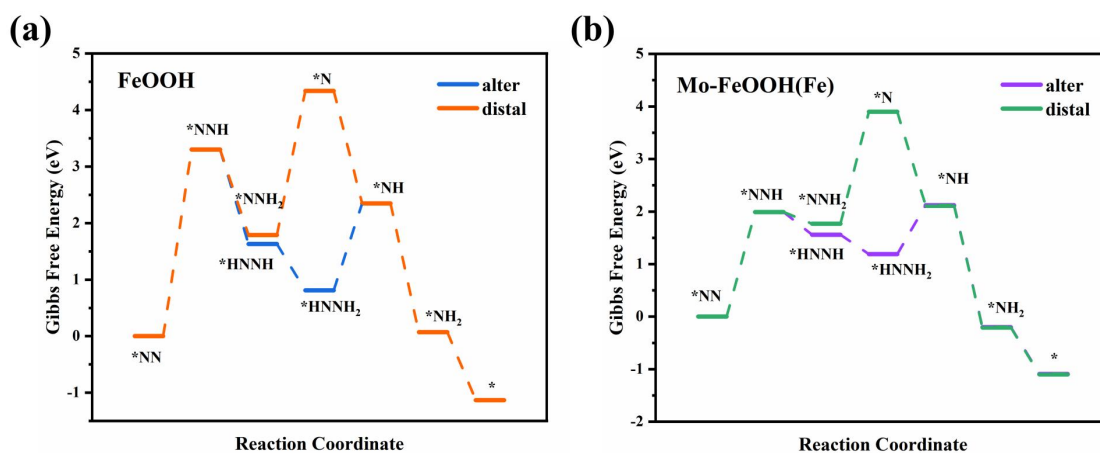

**Figure S31.** The Gibbs energy of electrolytic ammonia production over FeOOH (a) and Mo-FeOOH(Fe) samples.

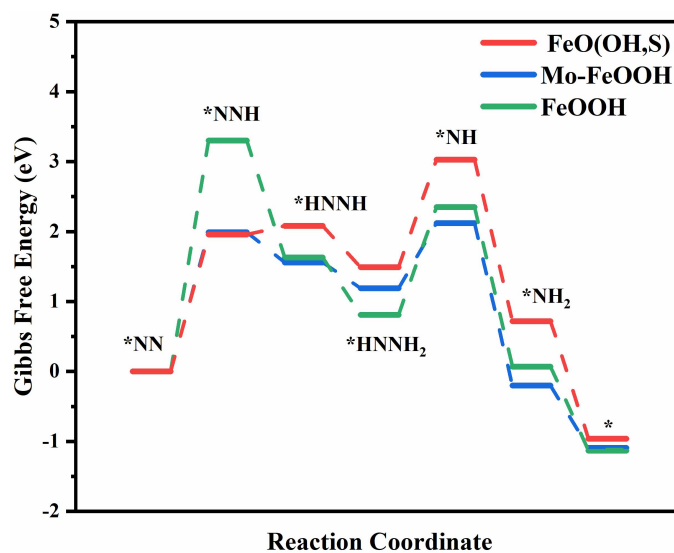

**Figure S32.** The Gibbs energy of electrolytic ammonia production over FeOOH, FeO(OH, S) and Mo-FeOOH samples in alter-pathway.

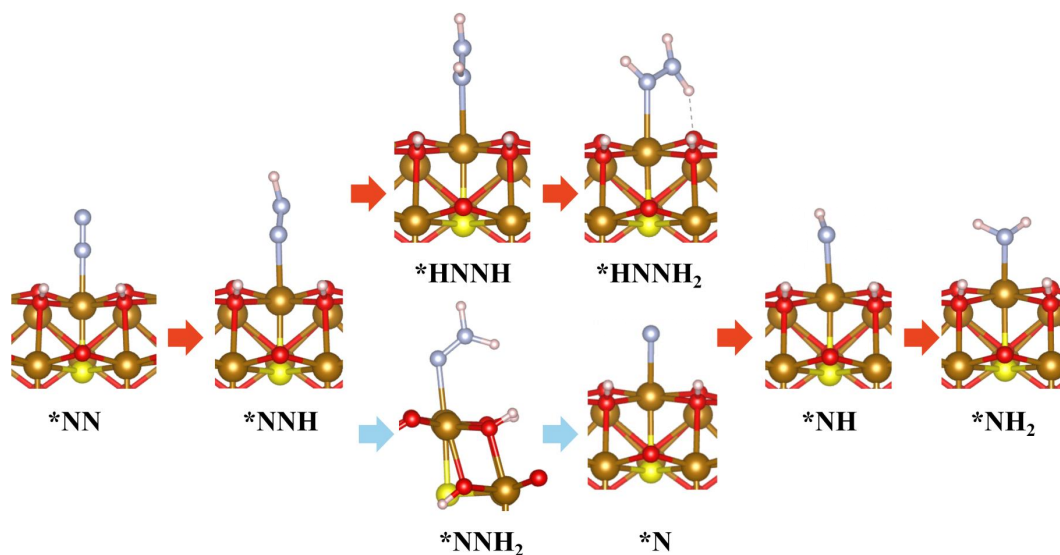

**Figure S33.** The adsorption configuration for each intermediate on the surface of FeO(OH, S).

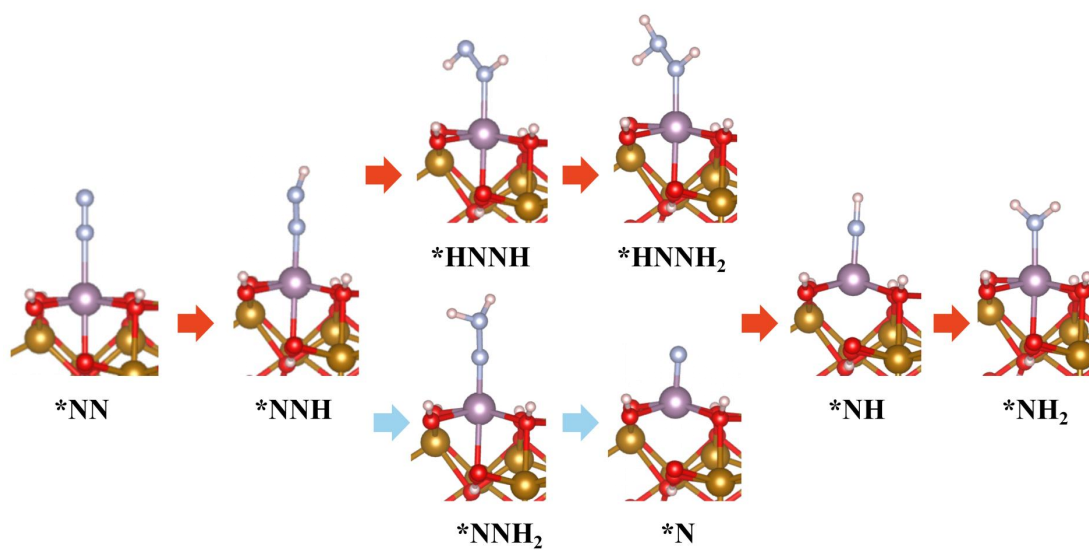

**Figure S34.** The adsorption configuration for each intermediate on the surface of Mo-FeOOH.

**Table S3. Comparison of the electrocatalytic activity of FeOOH-T to produce ammonia with previously reported studies**

| Catalyst                                                          | Electrolyte                                 | NH <sub>3</sub> Yield                                    | FE      |
|-------------------------------------------------------------------|---------------------------------------------|----------------------------------------------------------|---------|
| $\beta$ -FeOOH <sup>7</sup>                                       | 0.5 M LiClO <sub>4</sub>                    | 23.32 $\mu\text{g h}^{-1} \text{mg}_{\text{cat}}^{-1}$   | 6.7 %   |
| FeO(OH,F) <sup>8</sup>                                            | 0.5 M LiClO <sub>4</sub>                    | 42.38 $\mu\text{g h}^{-1} \text{mg}_{\text{cat}}^{-1}$   | 9.02 %  |
| FeOOH QDs/Graphene <sup>9</sup>                                   | 0.1 M LiClO <sub>4</sub>                    | 27.3 $\mu\text{g h}^{-1} \text{mg}_{\text{cat}}^{-1}$    | 14.6 %  |
| Zr- $\alpha$ -FeOOH <sup>10</sup>                                 | 0.1 M Na <sub>2</sub> SO <sub>4</sub>       | $1.39 \times 10^{-10} \text{ mol s}^{-1} \text{cm}^{-2}$ | 35.63 % |
| TiO <sub>2</sub> <sup>11</sup>                                    | 0.05 M H <sub>2</sub> SO <sub>4</sub> + PEG | 1.07 $\mu\text{mol cm}^{-2}\text{h}^{-1}$                | 32.13 % |
| Cu-HEX <sup>12</sup>                                              | 0.1 M KOH                                   | 1.2 $\mu\text{g h}^{-1} \text{cm}^{-2}$                  | 50.5 %  |
| Au/Fe <sub>2</sub> (MoO <sub>4</sub> ) <sub>3</sub> <sup>13</sup> | 0.2 m Na <sub>2</sub> SO <sub>4</sub>       | 7.61 $\mu\text{g h}^{-1} \text{mg}_{\text{cat}}^{-1}$    | 18.79 % |
| F-Fe: TiO <sub>2</sub> <sup>14</sup>                              | 0.05 M H <sub>2</sub> SO <sub>4</sub>       | 27.86 $\mu\text{g h}^{-1} \text{mg}_{\text{cat}}^{-1}$   | 27.67 % |
| FeMo/NC <sup>15</sup>                                             | 0.1 M Na <sub>2</sub> SO <sub>4</sub>       | 26.8 $\mu\text{g h}^{-1} \text{mg}_{\text{cat}}^{-1}$    | 11.8 %  |
| Fe-B/N-C <sup>16</sup>                                            | 0.1 M KOH                                   | 100.1 $\mu\text{g h}^{-1} \text{mg}_{\text{cat}}^{-1}$   | 23.0 %  |
| FeMoPPc <sup>17</sup>                                             | 0.1 M KOH                                   | 36.33 $\mu\text{g h}^{-1} \text{mg}_{\text{cat}}^{-1}$   | 20.62 % |
| Fe <sub>SA</sub> -NO-C <sup>18</sup>                              | 0.1 M HCl                                   | 31.9 $\mu\text{g h}^{-1} \text{mg}_{\text{cat}}^{-1}$    | 11.8 %  |
| D-FeN/C <sup>19</sup>                                             | 0.1 M KOH                                   | 24.8 $\mu\text{g h}^{-1} \text{mg}_{\text{cat}}^{-1}$    | 15.8 %  |
| Mo-Fe <sub>2</sub> O <sub>3</sub> <sup>20</sup>                   | 0.1 M Na <sub>2</sub> SO <sub>4</sub>       | 21.3 $\mu\text{g h}^{-1} \text{mg}_{\text{cat}}^{-1}$    | 11.2 %  |
| VS <sub>2</sub> -350 <sup>21</sup>                                | 0.1 M HCl                                   | 20.29 $\mu\text{g h}^{-1} \text{mg}_{\text{cat}}^{-1}$   | 3.86 %  |
| Fe <sub>SA</sub> -NSC-900 <sup>22</sup>                           | 0.1 M HCl                                   | 30.4 $\mu\text{g h}^{-1} \text{mg}_{\text{cat}}^{-1}$    | 21.9 %  |

**Table S3. Comparison of the electrocatalytic activity of FeOOH-T to produce ammonia with previously reported studies (Continued)**

| <b>Catalyst</b>                                                                               | <b>Electrolyte</b>                            | <b>NH<sub>3</sub> Yield</b>                                       | <b>FE</b>           |
|-----------------------------------------------------------------------------------------------|-----------------------------------------------|-------------------------------------------------------------------|---------------------|
| MoS <sub>2</sub> -Vs <sup>23</sup>                                                            | 0.1 M K <sub>2</sub> SO <sub>4</sub>          | 66.74 μg h <sup>-1</sup> mg <sub>cat</sub> <sup>-1</sup>          | 14.68 %             |
| S <sub>6.23</sub> -B <sub>8.09</sub> /CNFs <sup>24</sup>                                      | 0.5 M K <sub>2</sub> SO <sub>4</sub>          | 0.223 μmol h <sup>-1</sup> cm <sup>-2</sup>                       | 22.4 %              |
| CoS <sub>x</sub> /CC-L <sup>25</sup>                                                          | 0.05 M Na <sub>2</sub> SO <sub>4</sub>        | 12.2 μg h <sup>-1</sup> mg <sub>cat</sub> <sup>-1</sup>           | 10.1 %              |
| Bi <sub>2</sub> S <sub>3-x</sub> /Ti <sub>3</sub> C <sub>2</sub> T <sub>x</sub> <sup>26</sup> | 0.5 M LiClO <sub>4</sub>                      | 68.3 μg·h <sup>-1</sup> mg <sup>-1</sup>                          | 22.5 %              |
| Co <sub>3</sub> O <sub>4-x</sub> /GO <sup>27</sup>                                            | 0.1 M K <sub>2</sub> SO <sub>4</sub>          | 5.19 mmol h <sup>-1</sup> g <sup>-1</sup>                         | 10.68 %             |
| NiCo-LDH <sup>28</sup>                                                                        | 0.1 M Na <sub>2</sub> SO <sub>4</sub>         | 52.8 μg h <sup>-1</sup> mg <sub>cat</sub> <sup>-1</sup>           | 11.5 %              |
| TiWO <sub>3</sub> /SrWO <sub>4</sub> <sup>29</sup>                                            | 0.05 M H <sub>2</sub> SO <sub>4</sub>         | 11.17 μg h <sup>-1</sup> cm <sup>-2</sup>                         | 13.42 %             |
| Sn-CeO <sub>2-x</sub> <sup>30</sup>                                                           | 0.1 M HCl                                     | 41.1 μg h <sup>-1</sup> mg <sub>cat</sub> <sup>-1</sup>           | 35.3 %              |
| Ni <sub>3</sub> Mo <sup>31</sup>                                                              | 0.1 M Na <sub>2</sub> SO <sub>4</sub>         | 17.35 μg h <sup>-1</sup> cm <sup>-2</sup>                         | 8.94 %              |
| Fe-Ru CNS <sup>32</sup>                                                                       | 0.1 M Na <sub>2</sub> SO <sub>4</sub>         | 43.9 μg h <sup>-1</sup> mg <sub>cat</sub> <sup>-1</sup>           | 29.3 %              |
| Bi-MoO <sub>x</sub> @RGO <sup>33</sup>                                                        | 0.1 M Na <sub>2</sub> SO <sub>4</sub>         | 19.93 μg h <sup>-1</sup> mg <sub>cat</sub> <sup>-1</sup>          | 17.17 %             |
| <b>FeO(OH,S)</b><br><b>(This work)</b>                                                        | <b>0.1M</b><br><b>LiClO<sub>4</sub> + PEG</b> | <b>80.1 ± 4.0 μg h<sup>-1</sup> mg<sub>cat</sub><sup>-1</sup></b> | <b>36.9 ± 0.5 %</b> |
| <b>Mo-FeOOH</b><br><b>(This work)</b>                                                         | <b>0.1M</b><br><b>LiClO<sub>4</sub> + PEG</b> | <b>86.8 ± 4.1 μg h<sup>-1</sup> mg<sub>cat</sub><sup>-1</sup></b> | <b>29.1 ± 0.8 %</b> |

## Reference

1. P. L. Searle, *Analyst*, 1984, **109**, 549-568.
2. G. W. Watt and J. D. Chrisp, *Analytical Chemistry*, 1952, **24**, 2006-2008.
3. G. Kresse and J. Furthmüller, *Physical Review B*, 1996, **54**, 11169-11186.
4. G. Kresse and J. Furthmüller, *Computational Materials Science*, 1996, **6**, 15-50.
5. S. Grimme, J. Antony, S. Ehrlich and H. Krieg, *The Journal of Chemical Physics*, 2010, **132**, 154104.
6. X. Yang, J. Wan, H. Zhang and Y. Wang, *Chemical Science*, 2022, **13**, 11030-11037.
7. X. Zhu, Z. Liu, Q. Liu, Y. Luo, X. Shi, A. M. Asiri, Y. Wu and X. Sun, *Chemical Communications*, 2018, **54**, 11332-11335.
8. X. Zhu, Z. Liu, H. Wang, R. Zhao, H. Chen, T. Wang, F. Wang, Y. Luo, Y. Wu and X. Sun, *Chemical Communications*, 2019, **55**, 3987-3990.
9. X. Zhu, J. Zhao, L. Ji, T. Wu, T. Wang, S. Gao, A. A. Alshehri, K. A. Alzahrani, Y. Luo, Y. Xiang, B. Zheng and X. Sun, *Nano Research*, 2020, **13**, 209-214.
10. J. Tan, X. He, F. Yin, X. Liang, G. Li and Z. Li, *Applied Surface Science*, 2021, **567**, 150801.
11. Y. Guo, J. Gu, R. Zhang, S. Zhang, Z. Li, Y. Zhao, Z. Huang, J. Fan, Z. Chen and C. Zhi, *Advanced Energy Materials*, 2021, **11**, 2101699.
12. C. Du, C. Qiu, Z. Fang, P. Li, Y. Gao, J. Wang and W. Chen, *Nano Energy*, 2022, **92**, 106784.
13. J. Yao, Y. Zhou, J.-M. Yan and Q. Jiang, *Advanced Energy Materials*, 2021, **11**, 2003701.
14. G. Song, R. Gao, Z. Zhao, Y. Zhang, H. Tan, H. Li, D. Wang, Z. Sun and M. Feng, *Applied Catalysis B: Environmental*, 2022, **301**, 120809.
15. W. Cui, B. Geng, X. Chu, J. He, L. Jia, X. Han, X. Wang, S. Song and H. Zhang, *Nano Research*, 2023, **16**, 5743-5749.
16. Y. Zhao, S. Zhang, C. Han, Q. Lu, Q. Fu, H. Jiang, L. Yang, Y. Xing, Q. Zheng,

- J. Shen, L. Yan and X. Zhao, *Chemical Engineering Journal*, 2023, **468**, 143517.
17. Y. Wang, W. Cheng, P. Yuan, G. Yang, S. Mu, J. Liang, H. Xia, K. Guo, M. Liu, S. Zhao, G. Qu, B.-A. Lu, Y. Hu, J. Hu and J.-N. Zhang, *Advanced Science*, 2021, **8**, 2102915.
18. J. Zhang, S. Geng, R. Li, X. Zhang, Y. Zhou, T. Yu, Y. Wang, S. Song and Z. Shao, *Chemical Engineering Journal*, 2021, **420**, 130492.
19. Y. Kong, L. Wu, X. Yang, Y. Li, S. Zheng, B. Yang, Z. Li, Q. Zhang, S. Zhou, L. Lei, G. Wu and Y. Hou, *Advanced Functional Materials*, 2022, **32**, 2205409.
20. Z.-Y. Niu, L. Jiao, T. Zhang, X.-M. Zhao, X.-F. Wang, Z. Tan, L.-Z. Liu, S. Chen and X.-Z. Song, *ACS Applied Materials & Interfaces*, 2022, **14**, 55559-55567.
21. L. Zhao, Y. Xiong, X. Wang, R. Zhao, X. Chi, Y. Zhou, H. Wang, Z. Yang and Y.-M. Yan, *Small*, 2022, **18**, 2106939.
22. Y. Li, Y. Ji, Y. Zhao, J. Chen, S. Zheng, X. Sang, B. Yang, Z. Li, L. Lei, Z. Wen, X. Feng and Y. Hou, *Advanced Materials*, 2022, **34**, 2202240.
23. H. Fei, R. Liu, J. Wang, T. Guo, Z. Wu, D. Wang and F. Liu, *Advanced Functional Materials*, **n/a**, 2302501.
24. Y. Wen, H. Zhu, J. Hao, S. Lu, W. Zong, F. Lai, P. Ma, W. Dong, T. Liu and M. Du, *Applied Catalysis B: Environmental*, 2021, **292**, 120144.
25. L. Zhao, B. Chang, T. Dong, H. Yuan, Y. Li, Z. Tang, Z. Liu, H. Liu, X. Zhang and W. Zhou, *Journal of Materials Chemistry A*, 2022, **10**, 20071-20079.
26. Y. Luo, P. Shen, X. Li, Y. Guo and K. Chu, *Nano Research*, 2022, **15**, 3991-3999.
27. Y. Sun, Q. Wang and Z. Liu, *ACS Applied Materials & Interfaces*, 2022, **14**, 43508-43516.
28. Z. Zou, L. Wu, F. Yang, C. Cao, Q. Meng, J. Luo, W. Zhou, Z. Tong, J. Chen, S. Chen, S. Zhou, J. Wang and S. Deng, *ChemSusChem*, 2022, **15**, e202200127.
29. K. Chen, X. Xu, Q. Mei, J. Huang, G. Yang and Q. Wang, *Applied Catalysis B:*



- Environmental*, 2024, **341**, 123299.
30. Y. Xiao, X. Tan, Y. Guo, J. Chen, W. He, H. Cui and C. Wang, *Journal of Energy Chemistry*, 2023, **87**, 400-407.
  31. H. Y. Zhou, Y. B. Qu, Y. C. Fan, Z. L. Wang, X. Y. Lang, J. C. Li and Q. Jiang, *Applied Catalysis B: Environmental*, 2023, **339**, 123133.
  32. M. Liu, S. Zhang, M. Chen, S. Zhou and L. Wu, *Journal of Materials Chemistry A*, 2023, **11**, 14900-14910.
  33. Y. Wan, Z. Wang, M. Zheng, J. Li and R. Lv, *Journal of Materials Chemistry A*, 2023, **11**, 818-827.
